# Supplementary material
Source: MDPI journal article supplement (https://www.mdpi.com/1424-8247/16/7/957)
Supplement: s1 [file s1]

## **Supplementary Materials**

### **Pectin Nanoparticle-Loaded Soft Coral *Nephthea* sp. Extract as *In Situ* Gel Enhances Chronic Wound Healing: *In Vitro*, *In Vivo*, and *In Silico* Studies**

Nevine H. Hassan <sup>1</sup>, Seham S. El-Hawary <sup>2</sup>, Mahmoud Emam <sup>3</sup>, Mohamed A. Rabeh <sup>4</sup>, Mohamed A. Tantawy <sup>5,6,7</sup>, Mohamed Seif <sup>8</sup>, Radwa M. A. Abd-Elal <sup>9,\*</sup>, Gerhard Bringmann <sup>10</sup>, Usama Ramadan Abdelmohsen <sup>11,12,\*</sup> and Nabil M. Selim <sup>2,\*</sup>

**A**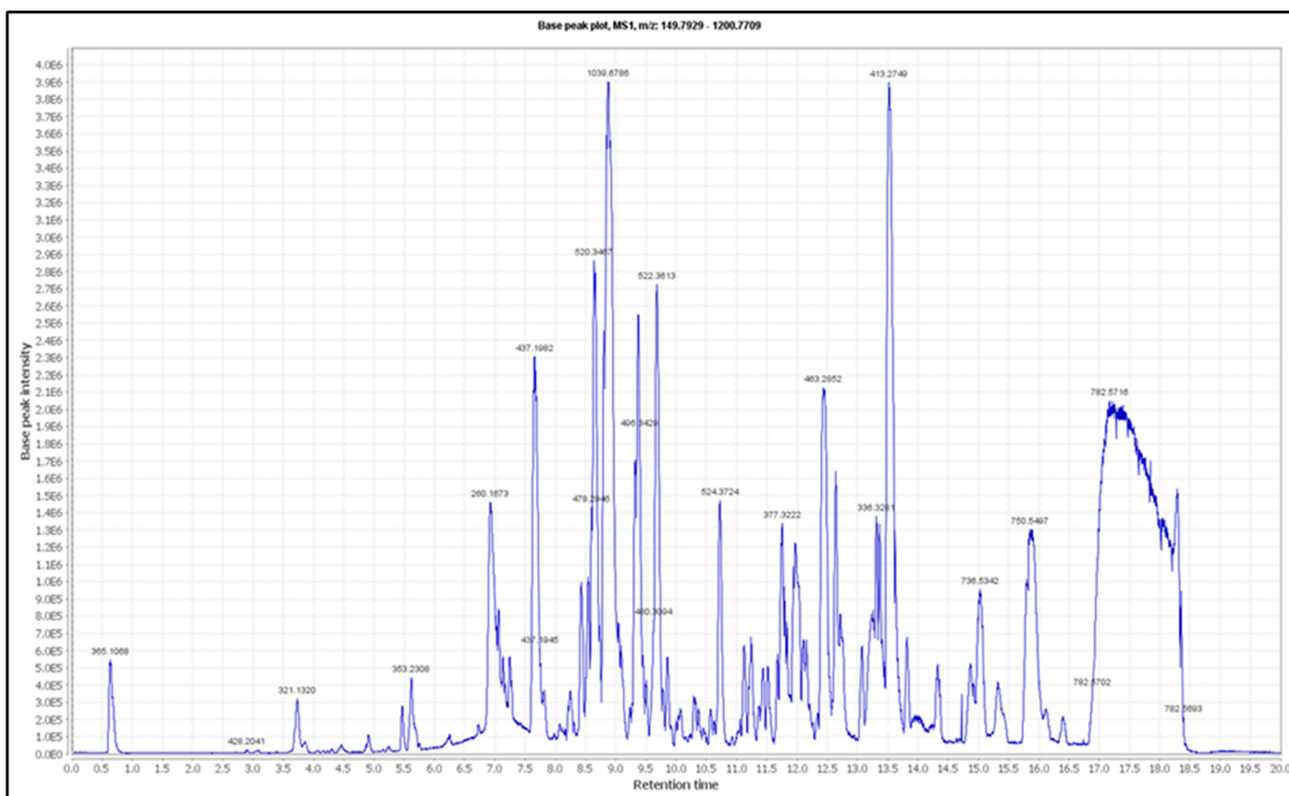**B**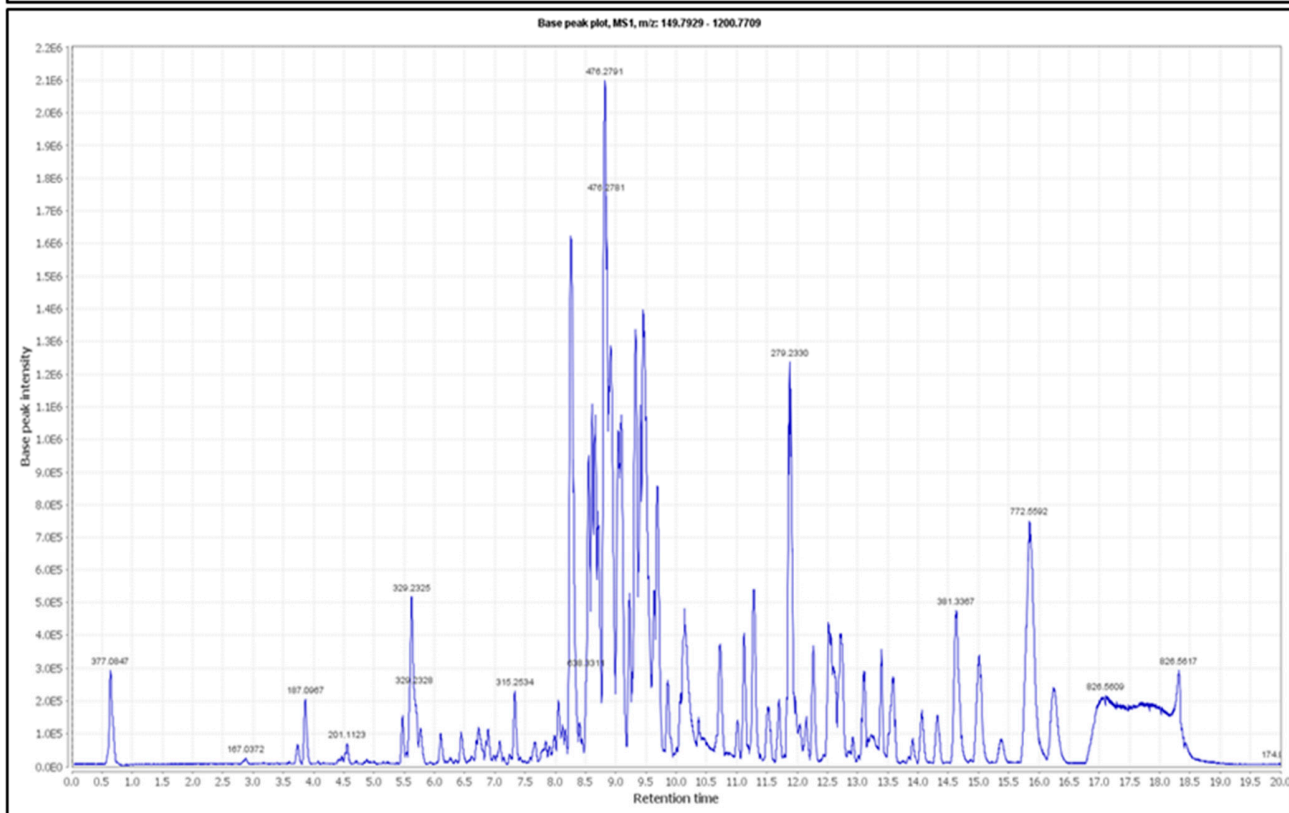

Figure S1. Total ion chromatogram of *Nephthea* sp. extract recorded in (A) positive ionization mode and (B) negative ionization mode.

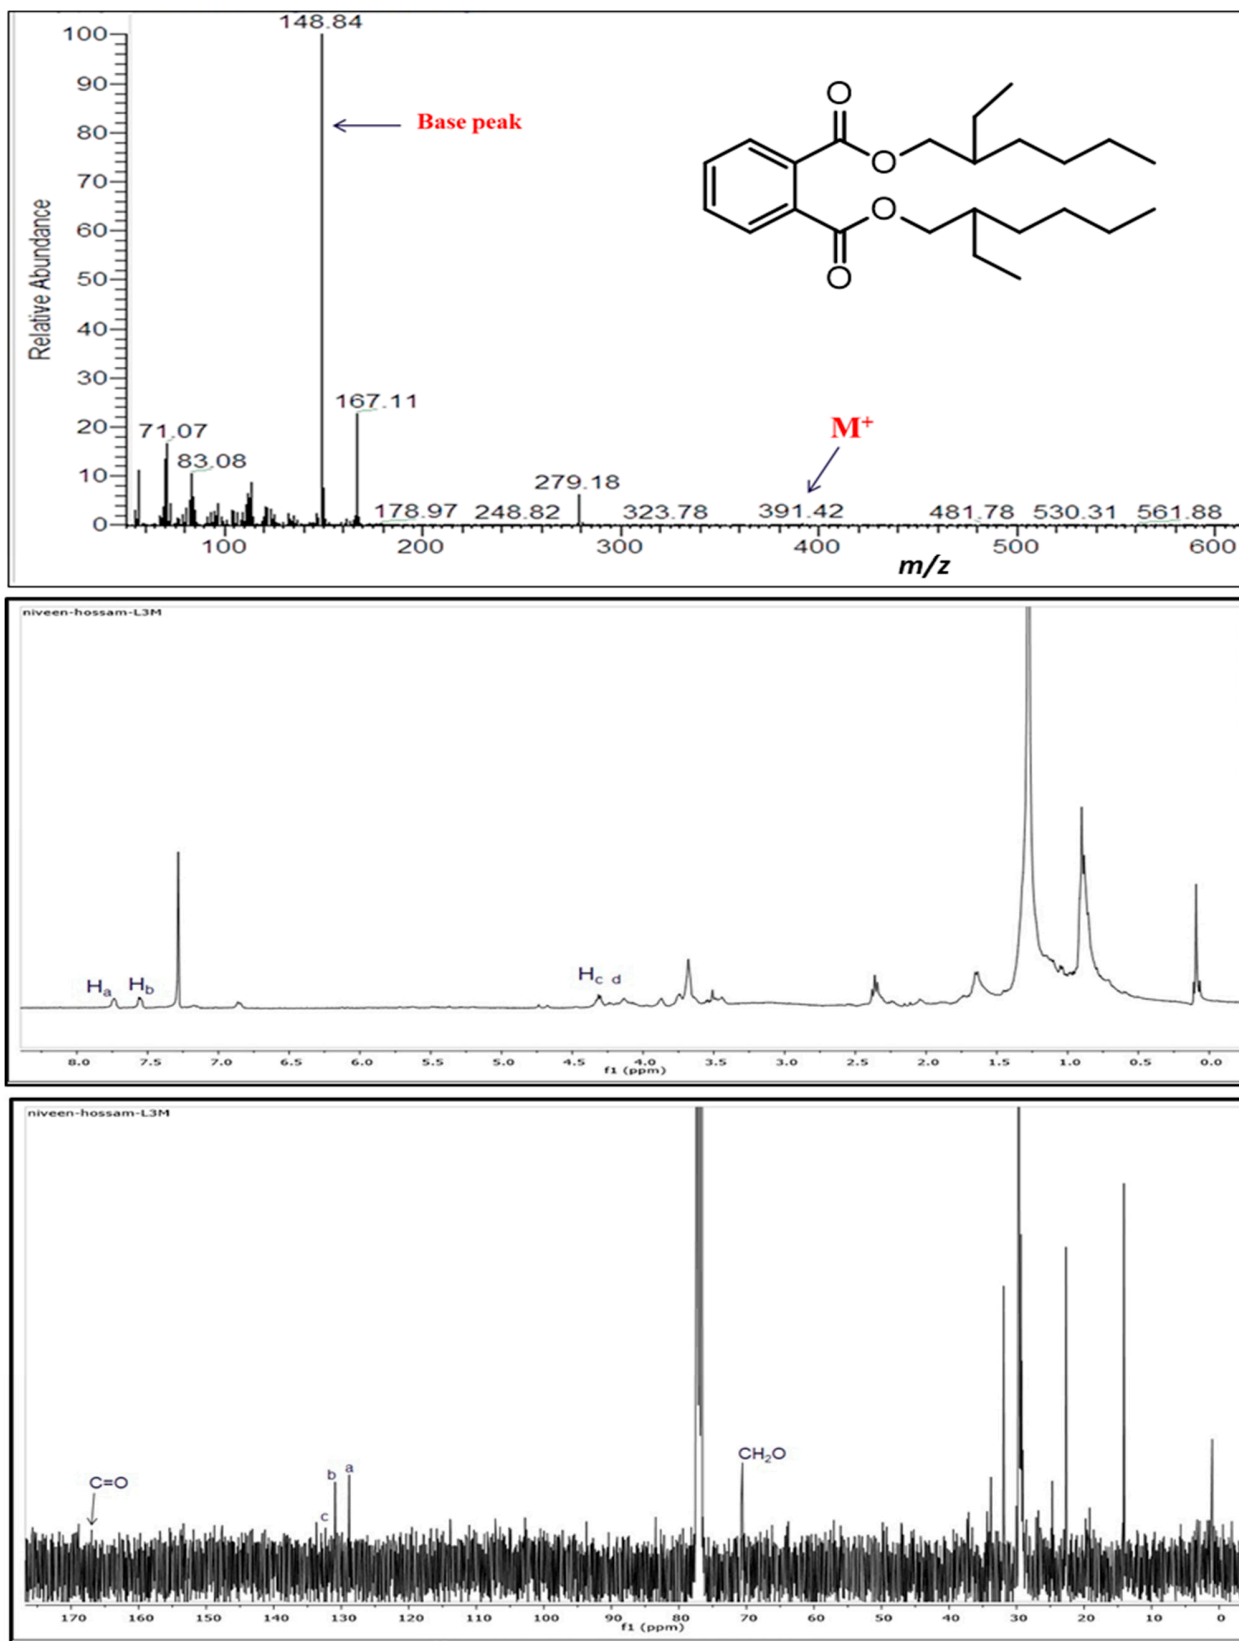

Figure S2. ESI-MS as well as <sup>1</sup>H NMR and <sup>13</sup>C NMR spectra of compound 12 (bis-(2-ethylhexyl)-phthalate) measured in CDCl<sub>3</sub>

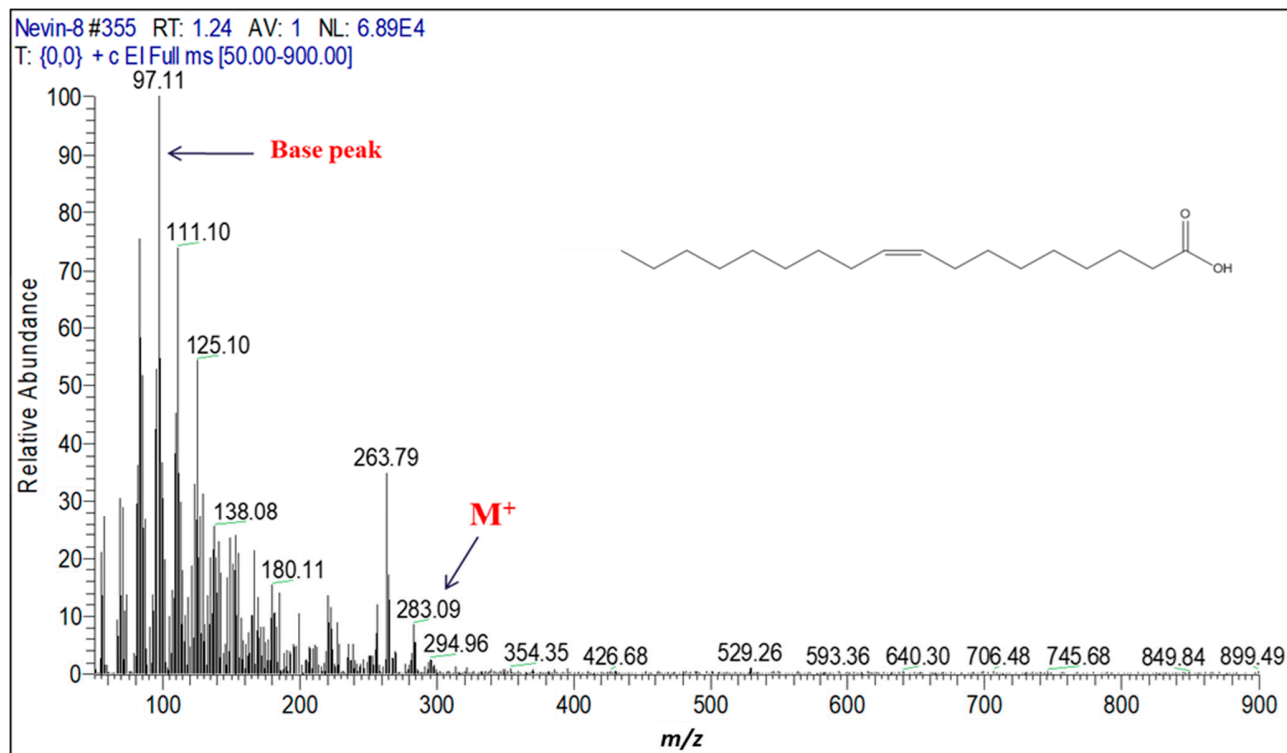

Figure S3. ESI-MS spectra of compound **18** (oleic acid) measured in  $CDCl_3$

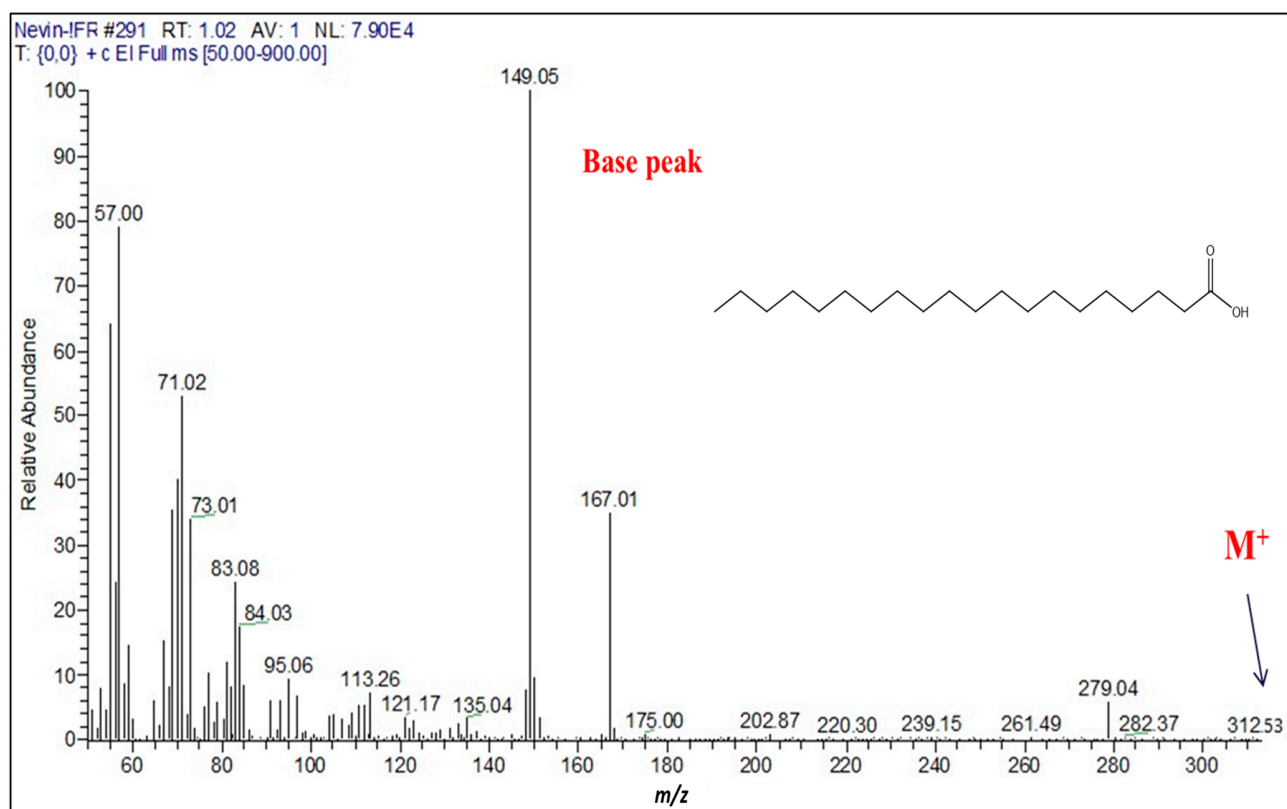

Figure S4. ESI-MS spectra of compound **20** (arachidic acid) measured in  $CDCl_3$

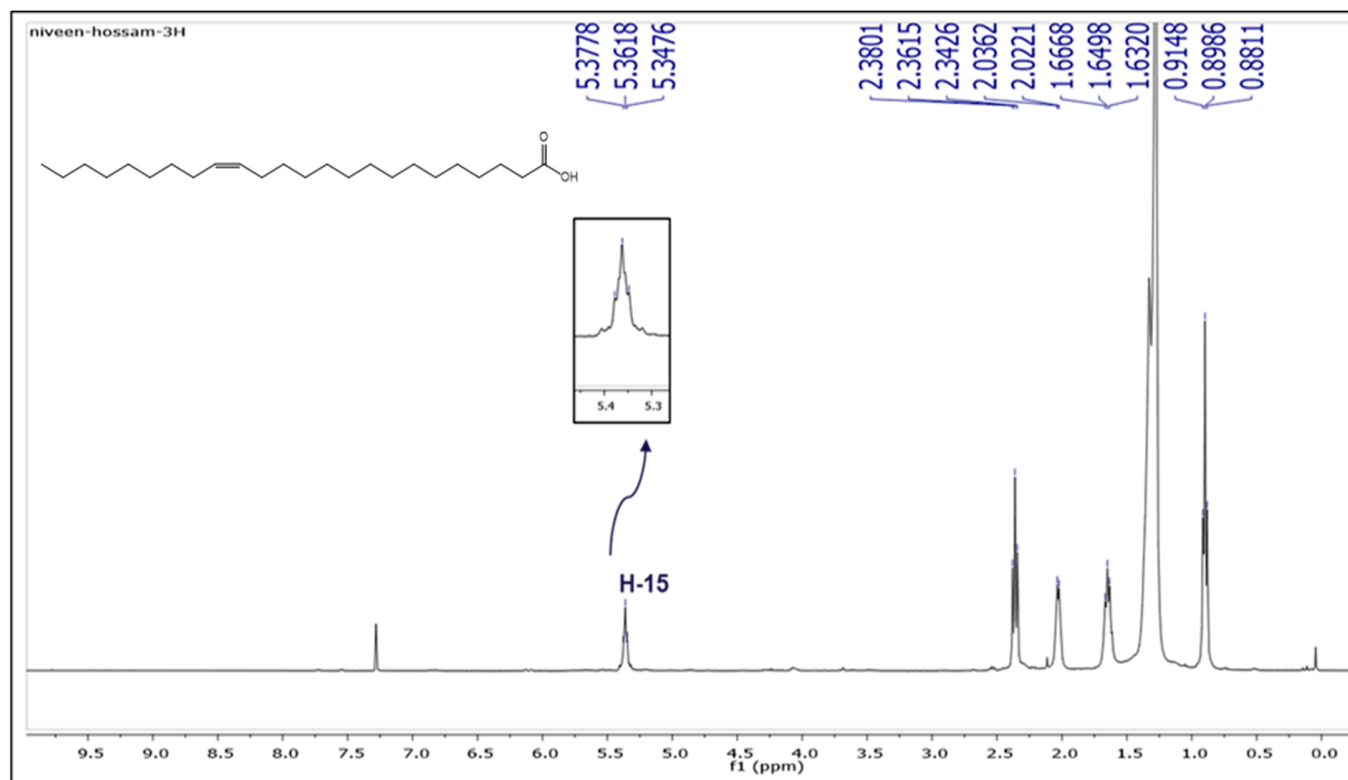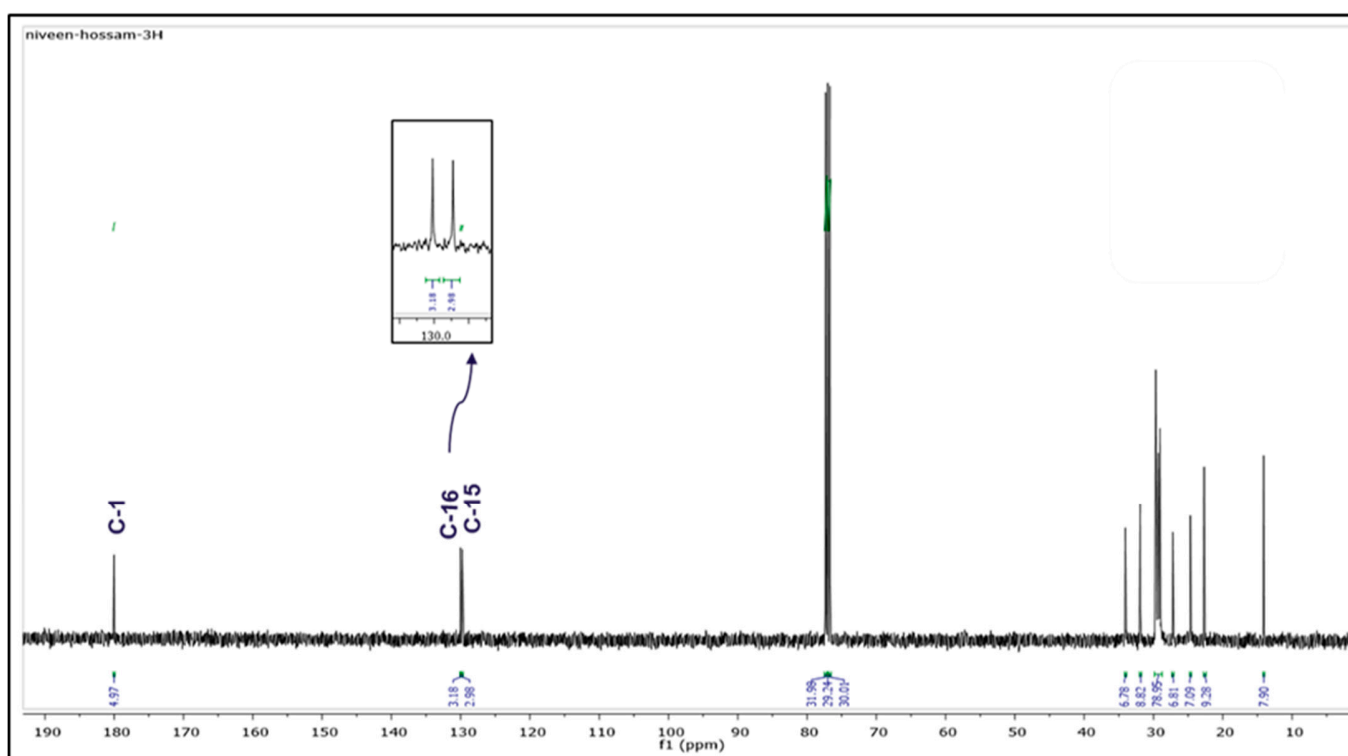

**Figure S5.**  $^1\text{H}$  NMR and  $^{13}\text{C}$  NMR spectra of compound **24** (nervonic acid) measured in  $\text{CDCl}_3$

**Table S1.** Medicinal- chemistry properties for the most active compounds.

| Parameter        | Compound                           |                    | Comment                                                                                                                                                                         |
|------------------|------------------------------------|--------------------|---------------------------------------------------------------------------------------------------------------------------------------------------------------------------------|
|                  | Chabrolohydroxybenzoquinone F (13) | Isogosterone B (9) |                                                                                                                                                                                 |
| QED              | 0.245                              | 0.416              | A measure of drug-likeness based on the concept of desirability; attractive: > 0.67; unattractive: 0.49~0.67; too complex: < 0.34                                               |
| Synth            | 4.146                              | 5.755              | The synthetic accessibility score is designed to estimate the ease of synthesis of drug-like molecules. SA score > 6: difficult to synthesize; SA score < 6: easy to synthesize |
| Fsp <sup>3</sup> | 0.481                              | 0.759              | The number of sp <sup>3</sup> hybridized carbons / total carbon count, correlating with melting point and solubility. Fsp <sup>3</sup> ≥ 0.42 is considered a suitable value    |
| MCE-18           | 28                                 | 114.529            | MCE-18 stands for medicinal chemistry evolution. MCE-18 ≥ 45 is considered a suitable value                                                                                     |
| Pfizer           | <u>Accepted</u>                    | <u>Accepted</u>    | Log P > 3; TPSA < 75; compounds with a high log P (> 3) and low TPSA (< 75) are likely to be toxic                                                                              |

**Table S2.** Absorption profile for the most active compounds.

| Parameter           | Compound                           |                    | Comment                                                                                                                                                                                                 |
|---------------------|------------------------------------|--------------------|---------------------------------------------------------------------------------------------------------------------------------------------------------------------------------------------------------|
|                     | Chabrolohydroxybenzoquinone F (13) | Isogosterone B (9) |                                                                                                                                                                                                         |
| HIA                 | 0.617                              | 0.035              | Human intestinal absorption. More close to 1 considered to be highly absorbed by intestine                                                                                                              |
| Caco-2 permeability | -4.802                             | -4.656             | Toxicity on normal cells, such as Caco-2 cells. Optimal: higher than -5.15 Log unit                                                                                                                     |
| MDCK permeability   | 3.23E-05                           | 2.11E-05           | Toxicity on normal cells such as MDCK cells; low permeability: < 2 × 10 <sup>6</sup> cm/s<br>medium permeability: 2–20 × 10 <sup>6</sup> cm/s<br>high passive permeability: > 20 × 10 <sup>6</sup> cm/s |

**Table S3.** Distribution properties for the most active compounds.

| Parameter        | Compound                           |                    | Comment                                                                                           |
|------------------|------------------------------------|--------------------|---------------------------------------------------------------------------------------------------|
|                  | Chabrolohydroxybenzoquinone F (13) | Isogosterone B (9) |                                                                                                   |
| BBB              | 0.019                              | 0.974              | Blood-brain barrier (BBB) penetration<br>More close to 1 considered to be highly permeable by BBB |
| PPB              | 98.61%                             | 86.57%             | Plasma protein binding (PPB)<br>Optimal drugs should have a value < 90%.                          |
| VD <sub>ss</sub> | 0.476                              | 0.931              | Volume distribution (VD)<br>Optimal: 0.04-20 L/kg                                                 |
| Fu               | 1.08%                              | 8.88%              | The fraction unbound (Fu) in plasma;<br>low: < 5%; middle: 5~20%; high: > 20%                     |

**Table S4.** Metabolism profile for the most active compounds.

| Parameter   | Compounds                          |                    | Comment                                     |
|-------------|------------------------------------|--------------------|---------------------------------------------|
|             | Chabrolohydroxybenzoquinone F (13) | Isogosterone B (9) |                                             |
| CYP1A2-inh  | 0.267                              | 0.003              | Closer to 1: considered to be an inhibitor. |
| CYP1A2-sub  | 0.36                               | 0.106              | Closer to 1: considered to be a substrate.  |
| CYP2C19-inh | 0.449                              | 0.024              | Closer to 1: considered to be an inhibitor. |
| CYP2C19-sub | 0.526                              | 0.721              | Closer to 1: considered to be a substrate.  |
| CYP2C9-inh  | 0.595                              | 0.09               | Closer to 1: considered to be an inhibitor. |
| CYP2C9-sub  | 0.944                              | 0.107              | Closer to 1: considered to be a substrate.  |
| CYP2D6-inh  | 0.905                              | 0.005              | Closer to 1: considered to be an inhibitor. |
| CYP2D6-sub  | 0.103                              | 0.047              | Closer to 1: considered to be a substrate.  |
| CYP3A4-inh  | 0.809                              | 0.732              | Closer to 1: considered to be an inhibitor. |
| CYP3A4-sub  | 0.215                              | 0.7                | Closer to 1: considered to be a substrate.  |

**Table S5.** Excretion for the most active compounds.

| Parameter | Compounds                          |                    | Comment                                                                                                                                                                                                                                                              |
|-----------|------------------------------------|--------------------|----------------------------------------------------------------------------------------------------------------------------------------------------------------------------------------------------------------------------------------------------------------------|
|           | Chabrolohydroxybenzoquinone F (13) | Isogosterone B (9) |                                                                                                                                                                                                                                                                      |
| CL        | 11.78                              | 12.429             | Clearance (CL): a compound that has a clearance > 15 mL/min/kg is considered to have a high clearance, while a compound that has a clearance from 5 to 15 mL/min/kg has a moderate clearance, and a compound that has a clearance < 5 mL/min/kg has a low clearance. |
| T12       | 0.484                              | 0.485              | Closer to 1: considered to have a long half-life.                                                                                                                                                                                                                    |
